# Supplementary material for: Summer Peaks in Uptake of Human Papillomavirus and Other Adolescent Vaccines in the United States
Source: Oxford University Press journal article supplement (doi:10.1158/1055-9965.epi-15-0574), 2015-12-16
Supplement: 10559965epi150574-sup-149798_2_supp_3226307_nxpxqk.docx [file 10559965epi150574-sup-149798_2_supp_3226307_nxpxqk.docx]

**Supplementary Figure Legend**

**Supplementary Figure S1.** Summer peaks in adolescent vaccine uptake in U.S. for female and male adolescents. Uptake standardized at 100 per month for 2007 to 2012. Source: National Immunization Survey-Teen, administered 2008 to 2012.

**Supplementary Figure S2.** Summer peaks in concomitant uptake of HPV vaccine (first dose, among girls), Tdap booster, and meningococcal vaccine in the U.S. Uptake standardized at 100 per month for 2007 to 2011, separately. Source: National Immunization Survey-Teen, administered 2008 to 2012.
