# Supplementary material for: Summer Peaks in Uptake of Human Papillomavirus and Other Adolescent Vaccines in the United States
Source: Oxford University Press journal article supplement (doi:10.1158/1055-9965.epi-15-0574), 2015-12-16
Supplement: 10559965epi150574-sup-149798_2_supp_3226308_nxpxqk.docx [file 10559965epi150574-sup-149798_2_supp_3226308_nxpxqk.docx]

**Supplementary Table S1.** Magnitude of summer peaks in adolescent vaccination by state (source: National Immunization Survey-Teen, administered 2008 to 2012; *n*=70,144 adolescents).

|  |  | HPV1 | | | Tdap | | | Meng | | |
| --- | --- | --- | --- | --- | --- | --- | --- | --- | --- | --- |
|  | *N* | *T* | magnitude (RHL[var]) | | *T* | magnitude (RHL[var]) | | *T* | magnitude (RHL[var]) | |
| Alabama | 1252 | 3,031* | 4.2 | (0.01) | 6,998* | 4.4 | (0.01) | 8,216* | 6.8 | (0.01) |
| Alaska | 1058 | 695* | 6.3 | (0.01) | 1,413* | 7.2 | (0.01) | 1,792* | 17.9 | (0.01) |
| Arizona | 1391 | 6,685* | 5.2 | (0.01) | 9,413* | 3.6 | (0.01) | 16,821* | 4.9 | (0.01) |
| Arkansas | 833 | 3,046* | 37.7 | (0.01) | 4,033* | 7.8 | (0.01) | 3,657* | 15.0 | (0.01) |
| California | 1582 | 29,461* | 4.5 | (0.01) | 48,407* | 4.0 | (0.01) | 90,966* | 7.4 | (0.01) |
| Colorado | 1408 | 3,239* | 4.3 | (0.01) | 11,533* | 5.9 | (0.01) | 11,910* | 12.1 | (0.01) |
| Connecticut | 1588 | 2,183* | 3.4 | (0.01) | 5,352* | 4.1 | (0.01) | 10,525* | 8.8 | (0.01) |
| Delaware | 1409 | 499* | 3.2 | (0.01) | 935* | 3.5 | (0.01) | 1,712* | 5.0 | (0.01) |
| District of Columbia | 1517 | 469* | 7.0 | (0.01) | 308* | 3.0 | (0.01) | 1,347* | 7.9 | (0.01) |
| Florida | 1374 | 10,910* | 4.4 | (0.01) | 30,650* | 6.2 | (0.01) | 36,766* | 8.8 | (0.01) |
| Georgia | 1258 | 6,479* | 5.6 | (0.01) | 12,250* | 3.9 | (0.01) | 21,645* | 7.5 | (0.01) |
| Hawaii | 1143 | 1,025* | 4.6 | (0.01) | 1,718* | 5.2 | (0.01) | 2,059* | 5.9 | (0.01) |
| Idaho | 903 | 2,054* | 56.9 | (0.01) | 2,640* | 7.7 | (0.01) | 3,316* | 15.4 | (0.01) |
| Illinois | 2748 | 6,925* | 4.8 | (0.01) | 21,718* | 5.2 | (0.01) | 34,551* | 16.4 | (0.01) |
| Indiana | 1584 | 3,611* | 5.0 | (0.01) | 8,551* | 3.7 | (0.01) | 16,902* | 7.3 | (0.01) |
| Iowa | 1074 | 2,439* | 5.7 | (0.01) | 4,544* | 5.7 | (0.01) | 5,005* | 7.9 | (0.01) |
| Kansas | 1248 | 2,820* | 12.3 | (0.01) | 6,174* | 6.2 | (0.01) | 5,521* | 13.1 | (0.01) |
| Kentucky | 1020 | 1,670* | 3.4 | (0.01) | 6,264* | 6.5 | (0.01) | 6,779* | 8.0 | (0.01) |
| Louisiana | 1387 | 3,653* | 4.3 | (0.01) | 8,867* | 6.6 | (0.01) | 16,836* | 15.6 | (0.01) |
| Maine | 1309 | 670* | 3.5 | (0.01) | 1,168* | 3.1 | (0.01) | 2,294* | 5.4 | (0.01) |
| Maryland | 1384 | 3,139* | 3.9 | (0.01) | 9,519* | 6.3 | (0.01) | 13,793* | 6.8 | (0.01) |
| Massachusetts | 1479 | 5,903* | 4.5 | (0.01) | 5,877* | 3.1 | (0.01) | 20,215* | 8.2 | (0.01) |
| Michigan | 1334 | 6,099* | 4.4 | (0.01) | 14,617* | 5.1 | (0.01) | 19,849* | 6.1 | (0.01) |
| Minnesota | 1156 | 5,061* | 8.5 | (0.01) | 8,162* | 5.3 | (0.01) | 12,251* | 13.3 | (0.01) |
| Mississippi | 686 | 965* | 4.1 | (0.01) | 1,926* | 4.0 | (0.01) | 2,822* | 8.1 | (0.01) |
| Missouri | 1266 | 3,977* | 5.4 | (0.01) | 10,394* | 6.3 | (0.01) | 10,037* | 7.4 | (0.01) |
| Montana | 1086 | 910* | 12.3 | (0.01) | 1,615* | 6.2 | (0.01) | 1,183* | 8.4 | (0.01) |
| Nebraska | 1153 | 814* | 3.2 | (0.01) | 2,588* | 4.7 | (0.01) | 4,398* | 10.6 | (0.01) |
| Nevada | 1183 | 4,328* | 98.2 | (0.01) | 5,973* | 6.5 | (0.01) | 9,005* | 40.3 | (0.01) |
| New Hampshire | 1359 | 1,282* | 4.9 | (0.01) | 1,435* | 3.0 | (0.01) | 3,618* | 7.4 | (0.01) |
| New Jersey | 1614 | 7,210* | 6.9 | (0.01) | 19,648* | 5.7 | (0.01) | 36,139* | 9.6 | (0.01) |
| New Mexico | 1441 | 777* | 2.5 | (0.01) | 4,531* | 5.1 | (0.01) | 4,798* | 9.5 | (0.01) |
| New York | 2715 | 22,260* | 7.6 | (0.01) | 39,260* | 4.5 | (0.01) | 43,429* | 6.1 | (0.01) |
| North Carolina | 1260 | 9,634* | 8.9 | (0.01) | 15,837* | 4.3 | (0.01) | 18,101* | 7.2 | (0.01) |
| North Dakota | 1242 | 455* | 6.1 | (0.01) | 1,335* | 5.7 | (0.01) | 2,235* | 11.8 | (0.01) |
| Ohio | 1137 | 9,375* | 6.5 | (0.01) | 12,420* | 4.1 | (0.01) | 20,629* | 5.8 | (0.01) |
| Oklahoma | 981 | 2,987* | 5.8 | (0.01) | 5,379* | 6.3 | (0.01) | 6,440* | 11.0 | (0.01) |
| Oregon | 1226 | 2,976* | 5.0 | (0.01) | 5,783* | 5.0 | (0.01) | 6,341* | 9.6 | (0.01) |
| Pennsylvania | 2907 | 11,219* | 4.8 | (0.01) | 20,082* | 5.1 | (0.01) | 38,034* | 9.0 | (0.01) |
| Rhode Island | 1438 | 708* | 2.9 | (0.01) | 1,153* | 4.0 | (0.01) | 1,963* | 6.1 | (0.01) |
| South Carolina | 909 | 1,011* | 2.5 | (0.01) | 3,834* | 3.6 | (0.01) | 6,941* | 7.3 | (0.01) |
| South Dakota | 954 | 2,735* | 50.0 | (0.01) | 1,626* | 11.7 | (0.01) | 1,690* | 19.3 | (0.01) |
| Tennessee | 1181 | 3,980* | 5.3 | (0.01) | 7,965* | 5.1 | (0.01) | 15,161* | 15.8 | (0.01) |
| Texas | 6236 | 20,190* | 6.4 | (0.01) | 53,091* | 6.0 | (0.01) | 74,826* | 13.7 | (0.01) |
| Utah | 1085 | 2,457* | 10.3 | (0.01) | 8,000* | 13.3 | (0.01) | 7,343* | 24.6 | (0.01) |
| Vermont | 1441 | 527* | 4.6 | (0.01) | 947* | 3.7 | (0.01) | 1,205* | 7.4 | (0.01) |
| Virginia | 1219 | 7,166* | 6.6 | (0.01) | 13,168* | 5.4 | (0.01) | 15,761* | 7.7 | (0.01) |
| Washington | 1291 | 7,312* | 4.9 | (0.01) | 15,848* | 6.1 | (0.01) | 16,774* | 7.6 | (0.01) |
| West Virginia | 940 | 1,648* | 8.8 | (0.01) | 1,708* | 4.3 | (0.01) | 2,729* | 9.2 | (0.01) |
| Wisconsin | 1321 | 5,338* | 5.7 | (0.01) | 14,340* | 5.9 | (0.01) | 17,355* | 12.6 | (0.01) |
| Wyoming | 1221 | 512* | 6.2 | (0.01) | 627* | 3.8 | (0.01) | 1,217* | 12.0 | (0.01) |

*Note.* HPV=human papillomavirus vaccine; Tdap=tetanus, diphtheria, and pertussis booster; Meng=meningococcal vaccine; *T*=Edwards T statistic; RHL=ratio of highest to lowest vaccination; var=variance. **p*<.001.

1Uptake of first dose among female adolescents only.
